# Supplementary material for: Cytochrome b5 reductase is the component from neuronal synaptic plasma membrane vesicles that generates superoxide anion upon stimulation by cytochrome c
Source: PubMed Central journal article supplement — Redox Biol. 2017 Nov 27;15:109–14. doi: 10.1016/j.redox.2017.11.021 (PMC5726884; doi:10.1016/j.redox.2017.11.021), 2017-11-27

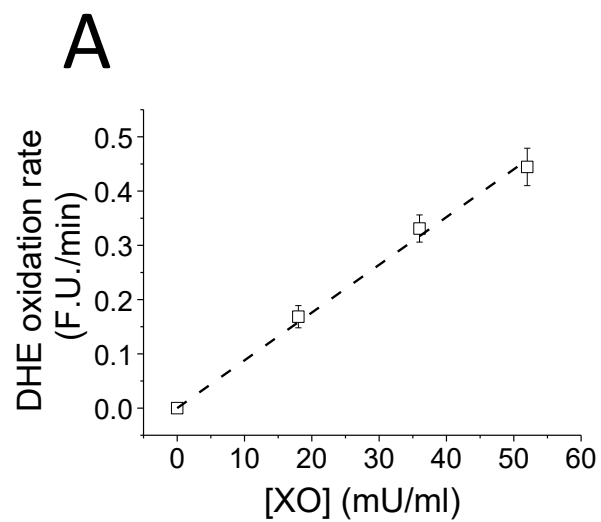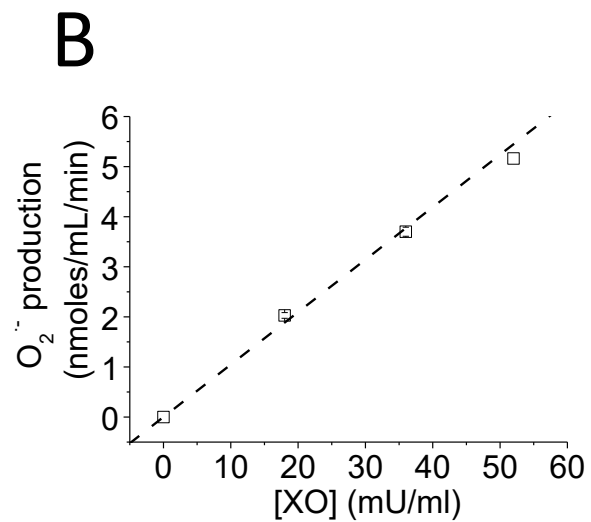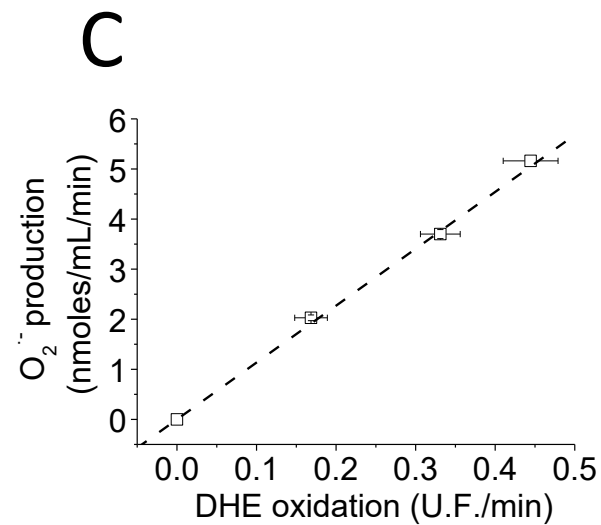

Supp. Fig. S1

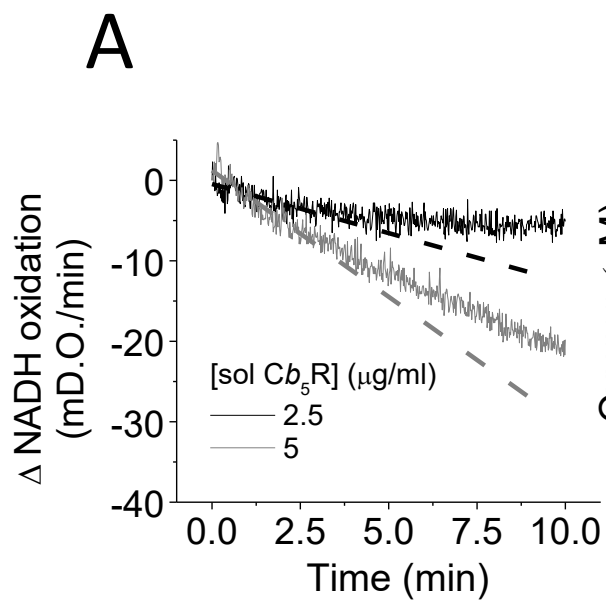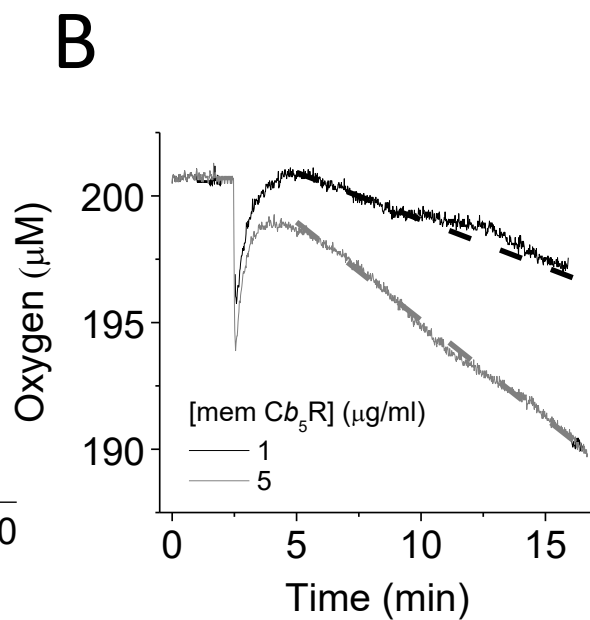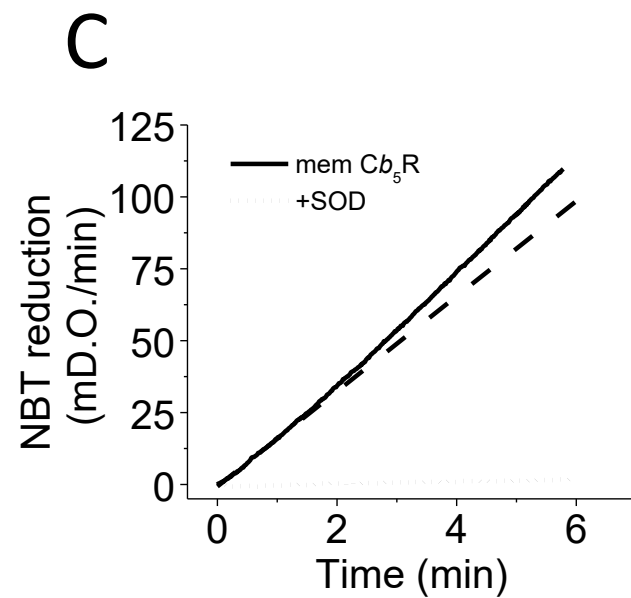

Supp. Fig. S2

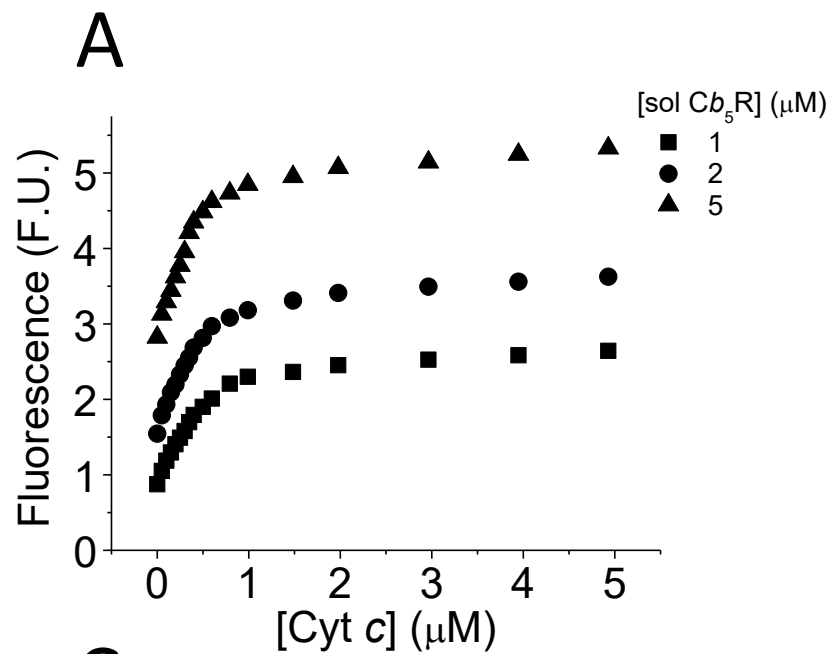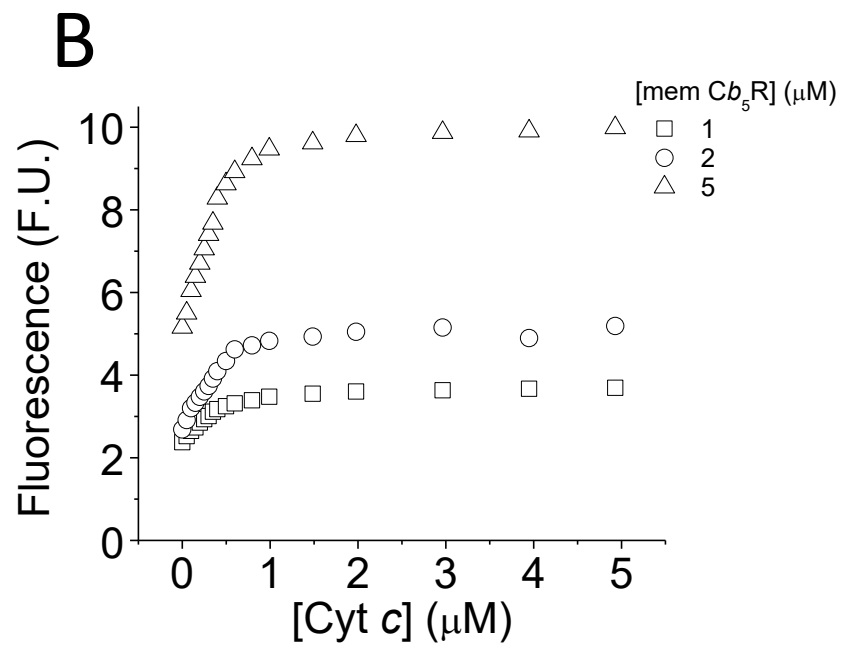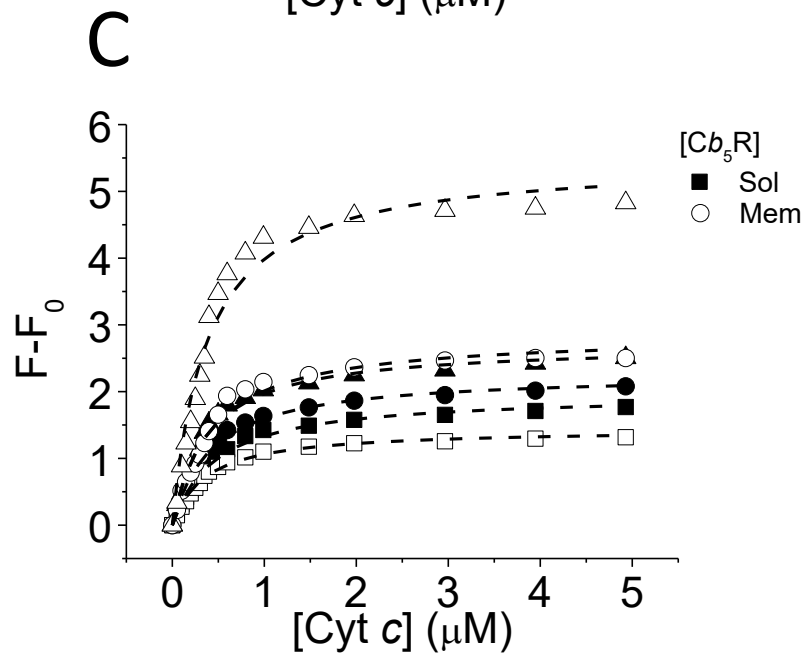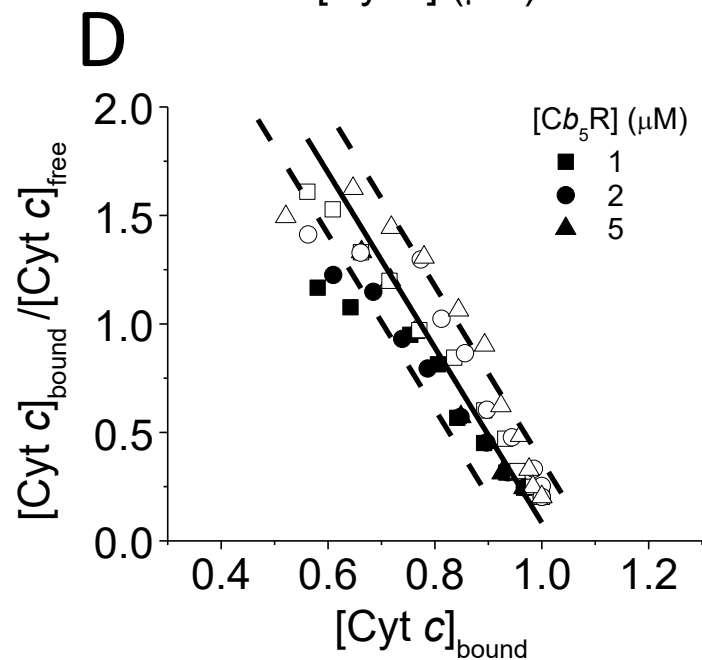

Supp. Fig. S3

**A**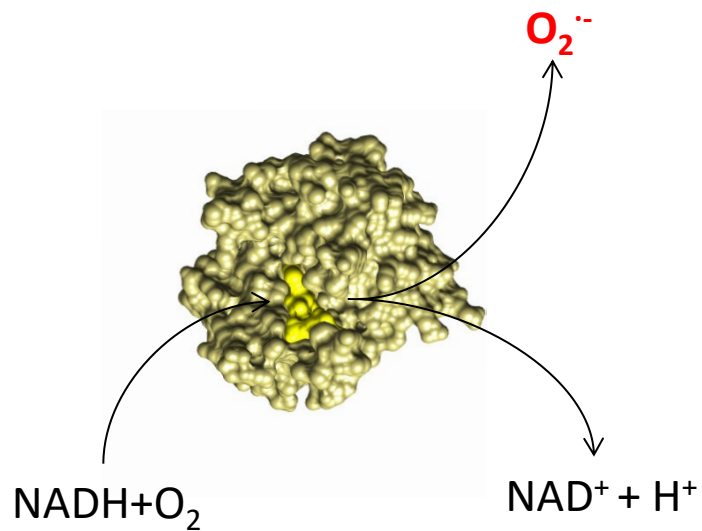**B**

electron mediated pathway

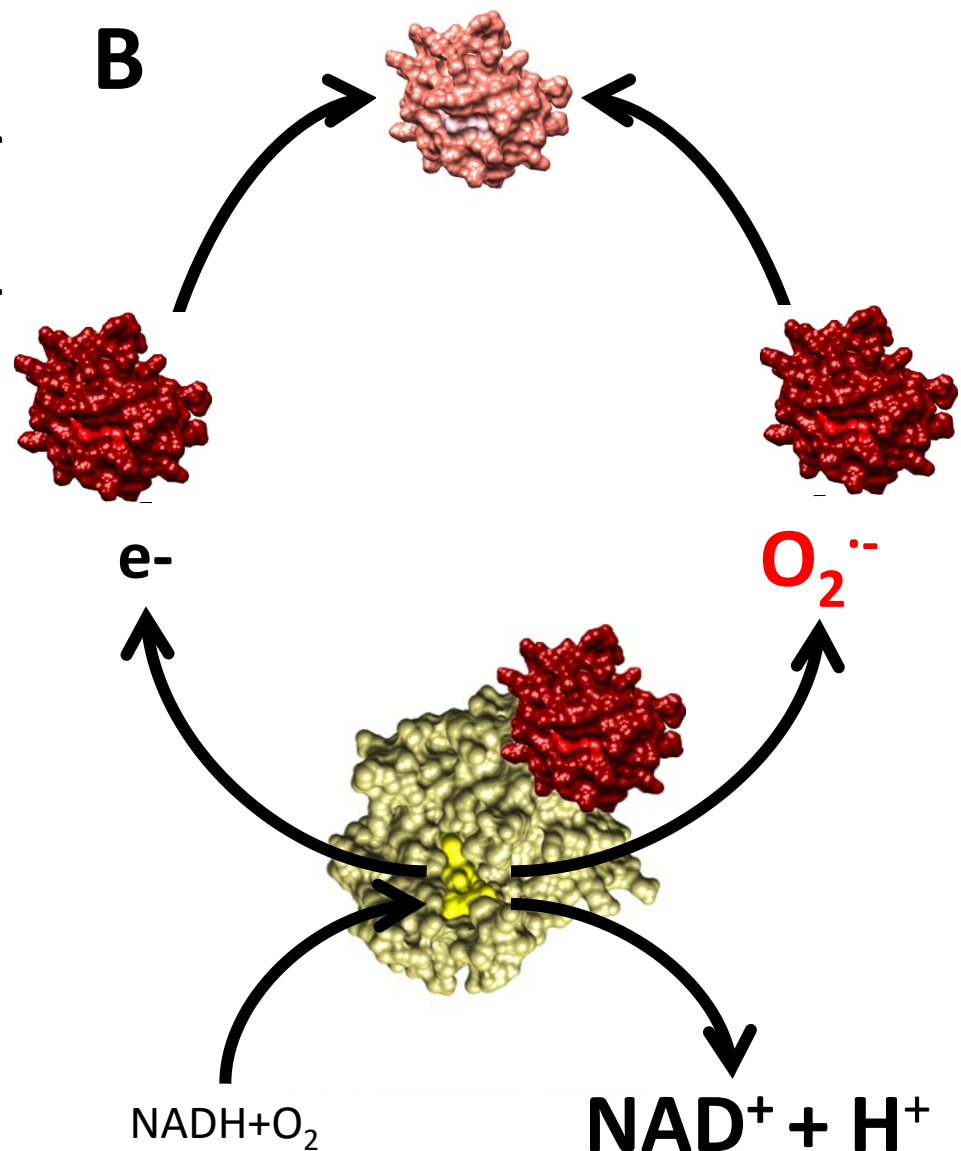 $\text{O}_2^{\cdot-}$  mediated pathway**Legend****Supp. Fig. S4**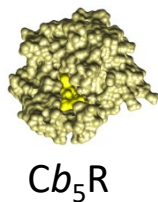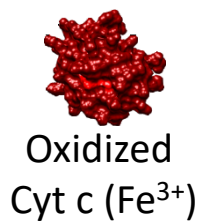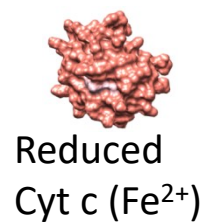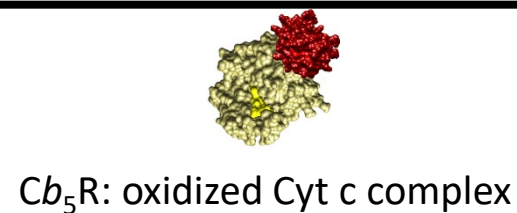

Supplement: mmc1.pdf [file mmc1.pdf]
