# Supplementary material for: Cytochrome b5 reductase is the component from neuronal synaptic plasma membrane vesicles that generates superoxide anion upon stimulation by cytochrome c
Source: PubMed Central journal article supplement — Redox Biol. 2017 Nov 27;15:109–14. doi: 10.1016/j.redox.2017.11.021 (PMC5726884; doi:10.1016/j.redox.2017.11.021), 2017-11-27
Supplement: mmc2.pdf [file mmc2.pdf]

## SUPPLEMENTARY MATERIAL

### *Analysis of the stimulated $O_2^{\cdot-}$ production by $Cb_5R$ using DHE*

Data analysis was performed based on the Cyt c stimulated  $O_2^{\cdot-}$  production by  $Cb_5R$  (sensitive to SOD) that reacts with DHE [9, 10] and Cyt c [11] following the two mainly proposed reactions:

- 1) 
$$DHE + O_2^{\cdot-} \rightarrow 2OH-E^+$$
- 2) 
$$\text{oxidized Cyt } c + O_2^{\cdot-} \rightarrow \text{reduced Cyt } c + O_2$$

Therefore, a  $K_m$  and  $k_{cat}$  can be determined using a two-substrate Michaelis-Menten kinetic model and data were analyzed by using the following equation:

$$v = \frac{[E]_0}{\left(\frac{1}{k_{cat}}\right) + \left(\frac{K_{mA}}{k_{cat}[A]}\right) + \left(\frac{K_{mB}}{k_{cat}[B]}\right)}$$

Where:  $v$  is the initial rate concentration;  $[E]_0$  is  $Cb_5R$  concentration;  $[A]$  and  $[B]$  are Cyt c and DHE concentrations, respectively, and  $K_{mA}$  and  $K_{mB}$  are their corresponding  $K_m$  values.

### *Details for human soluble and membrane $Cb_5R$ cloning*

Commercially available construct for soluble CYB5R3 (GenScript; CloneID:OHu12696) with the inserted sequence of *Homo sapiens* NADH-cytochrome b5 reductase 3 isoform 2 and membrane CYB5R3 (GenScript; CloneID:OHu22339) with the inserted sequence of *Homo sapiens* cytochrome b5 reductase 3 (CYB5R3), transcript variant 1, were used as templates for cloning, as indicated in [5]. Primers (0.1 $\mu$ M)(FW- 5'-CAATGCCATGGCTATGAAGCTGTTCCAGCGC-3' and RW-5'-CCCAAGCTTGCCCCGTCCGAAGACGAAGCAGCGCTC-3') for the soluble isoform and the commercial plasmid (GenScript; CloneID:OHu12696) (20ng) were added to the buffer (MgCl<sub>2</sub> 1.5 mM, dNTPs (0.25 mM) and enzyme (NZY proof DNA polymerase kit cat#MB14601, NZYtech), and PCR was used to prepare the insert. The procedure for preparing the insert of the membrane isoform was the same with Primers (0.1 $\mu$ M) (FW- 5'- CAATGCCATGGGGGCCAGCTC-3' and RV-5' CCC AAGCTTGCCCCGTCCGAAGACGAAGCAGCGCTC -3') using 20ng of plasmid (GenScript; CloneID:OHu22339). The adjusted PCR parameters were: 30 s at 95 °C, 30 s at 60°C and 60 s at 72°C °C for the soluble isoform, and 30 s at 95°C, 30 s at 58°C and 60 s at 72°C for the membrane isoform. The insert was ligated into to the cut and dephosphorylated pet22d plasmid previously dephosphorylated.

Ligation was accomplished using the Rapid DNA Ligation kit (cat#11635379001, Roche). Transformation was performed and positive colonies were picked to grow in LB Ampicillin. Purification of plasmids was done to obtain stock solutions that were frozen at -80°C.
